# Supplementary material
Source: publisher site journal article supplement (https://www.dovepress.com/article/377644)
Supplement: Supplementary file 1 [file get_supplementary_file.php]

| **Supplementary Table 1:** Studies' Charactaristics | | | | | | | | | | | | |
| --- | --- | --- | --- | --- | --- | --- | --- | --- | --- | --- | --- | --- |
| Authors | Setting | Design | Period | Purpose | Mean/Median Age (years) ± SD | Sample Size (patients) | Inclusion Criteria | Exclusion Criteria | Procalcitonin cut-off level (ng/mL) | Gold Standard Test (confirmation of bacterial infection) | Specific Pathogen | Overall Conclusion |
| Moreno-García et al. [12] | Barcelona, Spain | Observational cohort (retrospective) | 19 February 2020 - 24 February 2021 | To describe the current incidence of co-infection in hospitalized patients with COVID-19 and identify factors that may help clinicians initiate or discard empirical antibiotics correctly | Median**:** 64 | 1125 | 1- Hospital admission for more than 48 hours 2- Microbiological samples collected within the first 48 hours at hospital admission 3- Serum creatinine lower than 2 mg/dL 4- At least 1 PCT determination within the first 48 hours of admission. | Positive Urine Culture | 4 cut-off levels were used: 0.2, 0.5, 1, 2 | 1- Blood Culture  2- Sputum Culture 3- Pneumococcal urinary antigen  4- Legionella urinary antigen | N/A | 1- Patients with procalcitonin levels above the cut-off values had significantly more co-infections than those with lower levels. 2- Antibiotic use should be avoided in patients with COVID-19 and PCT values below 0.2. |
| Atallah et al. [13] | Boston, Massachusetts, USA | Retrospective observational study | March 17, 2020 - April 30, 2020 | To evaluate whether PCT concentrations can independently stratify and prognosticate secondary bacterial superinfection and patient outcome in the setting of SARS-CoV-2 infection | Median**:** 62 | 324 | Admitted adult inpatients (≥ 18 years of age) who had a positive SARS-CoV-2 RT-PCR assay with at least one PCT value. | 1- Presumed, but not confirmed, SARS-CoV-2 diagnosis. 2- If no PCT determinations were made. | 2 cut-off levels were used: 0.25, 0.5 | 1- Blood Culture  2- Sputum Culture |  | 1- Elevated PCT levels in COVID-19 patients is a pattern consistent with a bacterial superinfection and associated with increased mortality. 2- Low serum PCT suggests that any detected potential bacterial pathogen is likely colonizing and not invasive; thus, indicating that antibiotic use is unnecessary. 3- PCT levels were positively associated with patient outcome and secondary bacterial infection; therefore, making it a useful prognostic biomarker in the clinical course of hospitalized COVID-19 patients. |
| Richards et al. [14] | Wales, United Kingdom | Retrospective observational study | March 9 2020 - June 5 2020 | To investigate the comparative efficacy of PCT and other commonly available biomarkers in revealing or predicting microbiologically proven secondary bacterial infection in ICU COVID-19 patients | Mean: 56.0 (±10.8) | 65 | 1- age ≥ 18 years old  2- SARS-CoV-2 infection confirmed by positive RT-PCR | N/A | N/A | "Laboratory- Confirmed" (specific test is not mentioned) |  | 1. prespecified rise in PCT by 50%, compared to a previous value at any time point, was significantly associated with the occurrence of secondary infection in ICU patients admitted with critical COVID-19. 2. Ventilator-associated pneumonia/tracheobronchitis and/or laboratory-confirmed bloodstream infection were significantly associated with a prespecified rise in PCT; thus, providing a promising insight into the usefulness of PCT measurement in predicting the emergence of secondary bacterial infection in critical care. |
| Basnet et al. [15] | Gwarko, Lalitpur, Nepal | Descriptive cross-sectional study | June 25, 2021 - December 24, 2021 | To find the prevalence of uropathogenic Escherichia coli among COVID-19 patients admitted to a tertiary care center | Median: 35 | 49 | RT-PCR confirmed SARS-CoV-2 patients that were admitted to the COVID ward of KISTMCTH | COVID-19 patients with inadequate documentation | Mean±SD procalcitonin levels in co-infected patients:  6.13±7.88 ng/ml | 1- Clinical symptoms 2- Increased white blood cell count, procalcitonin or C-reactive protein (CRP) levels 3- Positive results of bacterial culture |  | The co-infection of uropathogenic E. coli in COVID-19 patients admitted to the hospital was found to be lower than published literature. The serum procalcitonin value in patients with co-infection was higher than in patients without co-infection. |
| He et al. [16] | Changsha, China | Retrospective observational study | January 10 2020 - February 28 2020 | To understand the clinical characteristics of COVID-19 patients with clinically diagnosed bacterial co-infection (CDBC), and therefore contributing to their early identification and prognosis estimation | Median**:** 47 | 905 | N/A | N/A | 0.5 | Patients who met the criteria of CDBC: 1- newly increased WBC counting (>9.510^9/L), with a majority of neutrophil 2- newly increased airway purulent secretion 3- increased serum procalcitonin 4- typical peripheral ground glass opacity mixed with increased density effusion opacities 5- effective empiric anti-bacterial therapy |  | increased PCT level is of great sensitivity but less specificity for bacterial infection diagnosis as it could also some- times be increased in some other clinical syndromes (e.g. acute renal failure). Advanced age, high WBC account, lymphopenia, PCT, CRP, cardiovascular comorbidities, the utilities of glucocorticoid and ventilation are all risk factors of clinically-diagnosed bacterial co-infection (CDBC). |
| Vanhomwegen et al. [17] | Brussels, Belgium | Retrospective observational study | March 3, 2020 - June 2, 2020 | To explore the prognostic value of PCT at ICU admission in critically ill COVID-19 patients as well as the relationship between bacterial co-infection and PCT levels within 48 h from ICU admission | Median**:** 54.5 | 66 | All adults admitted to the ICU for acute respiratory failure related to SARS-CoV-2 pneumonia between 3 March 2020 and 2 June 2020 were retrospectively included. | N/A | 2 cut-off levels were used: 0.5, 2.5 | Blood culture  Respiratory tract culture |  | In conclusion, we show that PCT levels at ICU admission in COVID-19 patients are a predictor of mortality as accurate as APACHE II. Meanwhile, PCT is not reliable to diagnose bacterial co-infection within 48 h of admission. |
| Ming et al. [18] | North-West London, UK | Retrospective observational study | March 1, 2020 - May 6, 2020 | To characterize the longitudinal dynamics of C-reactive protein (CRP) and Procalcitonin (PCT) in a cohort of hospitalized patients with COVID-19 and support antimicrobial decision-making | Median**:** 67 | 237 | Adult patients (>18 years old) hospitalized in general wards and critical care settings between 1st March and 6th May 2020 who had tested positive for SARS-COV-2 polymerase chain reaction through nasopharyngeal swabs, collected by healthcare staff. | N/A | N/A | Blood culture Urine culture  Respiratory tract culture |  | The dynamic changes in CRP concentrations over time can be predictive of both, microbiological and survival outcomes in the context of COVID-19 in the patient group. For PCT, concentrations over time were consistently higher in patients with positive microbiology against those without, although this did not reach statistical significance. There was also a trend towards higher PCT levels in patients who died, but again differences over time were not statistically significant. |
| Cheng et al. [19] | Huangshi, China | Retrospective study | 10 January, 2020 - 9 March, 2020 | To Explore the risk factors for nosocomial bacterial infection of patients with COVID-19, and further to provide a theoretical basis for scientific prevention and control of nosocomial bacterial infection. | Mean: 53.1 (± 16.6) | 212 | Confirmed COVID-19 patients | Community acquired infection prior to patient's original diagnosis on admission into the hospital. | 0.1 | Confirmed by infection preventionists in those with urinary catheterization, arteriovenous intuba- tion, endotracheal intubation, use of ventilator and other treatment measures. | N/A | 1. After adjustments of the variables urinary catheterization, WBCs count, and procalcitonin could be considered as an independent factors for nosocomial infections in the patients with COVID-19.,  2. The nosocomial bacteria infection rate in patients with procalcitonin >0.1 ng/ mL was 4.92 times more than that in those with procalci-tonin ≤0.1 ng/mL 3. The procalcitonin levels were helpful in recognizing gram-negative bloodstream infections. |
| Heesom et al. [20] | Southampton, United Kingdom | Prospective, single center, cohort study | 6 April, 2020 - May 22, 2020 | To determine the antibiotic usage in COVID-19 patients post-introduction of PCT within 7 days of ICU admission, and to assess If mortality and length of stay in intensive care will be affected based on PCT values and antibiotic decision making. | Age according to PCT levels: 1. PCT <0.5 microgram/L= 54.4 (+/-11.3) 2. PCT> 0.5 microgram/L= 57.9 (+/-10) | 52 | All patients were tested positive for SARS-CoV-2 by real time polymerase chain reaction (RT-PCR) from a combined nose and throat swabs in a VIROCULT virus transport medium upon their admission to GICU. | N/A | 0.5 | N/A | N/A | The use of PCT as a guide for de-escalation of antibiotics was significantly associated with reduced antibiotic usage by 2 days in COVID-19 patients and can be used as an ABS tool. |
| Waris et al. [21] | Islamabad, Pakistan | Prospective cohort study | N/A | To evaluate the serum procalcitonin (PCT) 8 level as a biomarker for bacterial co-infection and disease severity in COVID-19 patients | Mean: 45.8 | 430 | All those individuals who were tested positive for the SARS-CoV-2 according to the WHO and CDC guidelines for the detection and diagnosis of COVID-19 were included in this study. | N/A | 3 cutoffs were used:   0.07 +/-0.06   0.5 +/- 0.4   >1 | Bacterial infections were defined on the basis of increased white blood cells (WBCs) counts and the increased level of PCT. | N/A | 1. The elevation in PCT level proportionally increased with the increase in age of the patients. 2. The fluctuation in 3. PCT level could be associated with the prognosis of the diseases. 4. The serial PCT measurement could predict the prognosis of COVID-19 patients. 5. The primary application of PCT in COVID-19 is its ability to exclude a bacterial co- infection associated with a negative predictive value >90% when a rule-out cut-off (<0.25 μg/L). 6. Statistically significant differences and demonstrated that PCT might determine the severity of patients infected with SARS-CoV-2.  7. The serum PCT measurement could evaluate the prognosis of the disease and the presence of bacterial co-infection in some COVID-19 patients. |
| Hughes et al. [22] | London, United Kingdom | Retrospective observational study | 1 December 2020 - 28 February 2021 | To analyze the impact of PCR as an antimicrobial stewardship (AMS) tool among patients with COVID-19 in an acute hospital setting | Median: 67.5 | 730 | All patients with confirmed SARS-CoC-2 between 01/12/2021-28/02/2021. | Early death within 72 hours from admission of SARS-CoV-2 detection. | 0.25 | 1. Blood culture 2. Respiratory MC&S (sputum culture) 3. Legionella urinary antigen 4. Pneumococcal urinary antigen 5. Viral Resp Screen 6. Peak CRP in 72hr of admission  7. WCC on admission | N/A | 1. A negative PCT on admission correlates with shorter antimicrobial courses, early cessation of therapy and predicts lower ITU admission during the admission. 2. a negative PCT is associated with better prognosis for the patient and subsequent early cessation of antibacterials. 3. a PCT assay in the in the in the first 48 hours may provide utility in excluding possible bacterial infections. 4. Low PCT (< 0.25pg/ml) correlates with low probability of bacterial infection and supports decision making to aid cessation of antibacterials at the 48–72 hour review.. |
| Pink et al. [23] | Hannover, Germany | Retrospective single-center study | 6 March, 2020 - 30 October, 2020 | To investigate the diagnostic value of PCT and CRP to detect secondary bacterial infections in patients with COVID-19 | Median: 57 | 99 | All hospitalized patients aged 18  years and older with confirmed COVID-19 pneumonia, admit- ted between 6th March and 30th October 2020 to a large university hospital, located in Hannover. | 1. Patients less than 18 years of age. 2. No PCT/CRP on admission.  3. No pneumonic infiltrates on chest imaging. | 0.55 | 1. Blood culture  2. Respiratory samples 3. BAL samples and bronchoscopy 4. Urine sample  5. Urinary antigen tests for L.pneumophila and S. pneumonia | N/A | 1. Patients with secondary bacterial infection had higher PCT and CRP levels on admission and during their hospital stay. 2. PCT levels < 0.55 ng/mL ruled out secondary bacterial infections with a negative predictive value of 94%. 3. With regard to antimicrobial stewardship, initiation of empirical antibacterial therapy in patients with low PCT can probably be avoided. 4. significant increase in both PCT and CRP levels was observed in patients with secondary bacterial infection. |
| Peters et al. [24] | Chesterfield, United Kingdom | Retrospective single-center study | 8 April, 2020 - 27 April, 2020 | Tp determine the extent to which PCT testing influenced antibiotic prescribing. | NA | 118 | All patients with suspected or confirmed COVID-19. | Patients with no COVID-19 swab and those in intensive therapy unit (ITU). | 3 cutoffs were used:   <0.25  0.25 - 0.49  >=0.5 | None | N/A | PCT use has helped reduce antibiotic prescriptions in all COVID-suspected or confirmed cases by 44%, with levels being used to guide antibiotic therapy in just under three quarters of cases. PCT testing in patients with suspected or confirmed COVID-19 at Chesterfield Royal Hospital has helped clinicians rationalize antibiotic prescribing and ultimately led to a reduction in unnecessary antibiotic use. PCT, when used in combination with thorough clinical assessment, is a safe, simple and sustainable way of reducing antibiotic use in COVID-19. |
| May et al. [25] | New York, United States | Retrospective cohort study | 10 March, 2020 - 30 June, 2020 | To examine the ability of procalcitonin to identify community-associated bacterial infection (CAI) as defined by positive microbiological results in blood, urine, or respiratory culture within 72 h of presen- tation in a cohort of patients with COVID-19 at a large medical center in New York City. | Mean: 65.2 (17.2) | 2443 | Adults who presented to the emergency department (ED) of New York-Presbyterian/Columbia University Irving Medical Center (NYP/CUIMC) or the Allen Hospital with a positive SARS-CoV-2 result on real-time reverse-transcription PCR (RT-PCR) assay from nasopharyngeal or oropharyngeal swab. | 1. Patients with who did not have bacterial infections from our sites of interest but had bacterial infections of peritoneal fluid abscess fluid (3), pericardial fluid (3), wounds (1), lung tissue (1), or other soft tissue (3) within 72 h of presentation. 2. Patients in whom procalcitonin was not measured within 72 h of presentation. | 2 cutoffs were used:   0.5   0.25 | 1. Microbiological studies 2. Urine culture |  | 1. Mean procalcitonin levels were significantly higher in patients with any CAI than in those without CAI. 2. procalcitonin was a poor predictor of CAI among adult patients with COVID-19. 3. Whereas procalcitonin was significantly elevated in patients with CAI compared with uninfected individuals, it demonstrated low sensitivity and specificity for identifying community-associated bacteremia, bac- terial pneumonia, and bacteriuria, using a cutoff of 0.25 or 0.5 ng/ml. 4. elevated procalci- tonin in COVID-19 is primarily driven by the inflammation caused by the disease itself rather than by bacterial coinfection, and procalcitonin is not a reliable guide for the decision to initiate antibiotics in patients with COVID-19. |
| Heer et al. [26] | Slough, United Kingdom | Retrospective cohort study | February 2020 - September 2020 | To identify the association between procalcitonin and Covid-19 disease severity in a critical care setting and whether bacterial co-infection is implicated. | Mean: 60 (± 12) | 60 | All patients treated for Covid-19 in a critical care setting (HDU or ITU) at our institution in the UK who had PCT concentrations measured between February and September 2020. | Patients who had ceilings of treatment. | Peak PCT>0.5 ng/mL | 1.. Blood culture  2. Sputum culture  3. Urine, line, wound cultures 4. Bronchial lavage or bronchoscopy 5. Urinary pneumococcal antigen  6. Legionella antigen tests | N/A | 1. PCT concentrations were not increased in patients with positive bacterial cultures compared with those with negative bacterial cultures. 2. PCT peak concentrations to be independent predictors of mortality. 3. increased serum PCT concentrations are associated with increased severity of Covid-19 as defined by respiratory failure necessitating invasive mechanical ventilation and in-hospital mortality. 4. Elevated PCT concentrations were associated with increased neutrophil count, and patients requiring invasive mechanical ventilation had higher mean neu- trophil count. 5. positive association between PCT and both LDH and CRP, elevated levels of which are seen in both severe Covid-19 and bacterial sepsis. |
| Tang et al. [27] | Zhuzho, China | Retrospective cohort study | 28 January, 2020 - 15 March, 2020 | To investigate co-infections with common respiratory pathogens and SARS-CoV-2 and laboratory biochemistry findings in patients with COVID-19 in the Zhuzhou area of China, in order to provide a reference for the disease assessment and clinical treatment of COVID-19 | 47.7 (± 17.2) | 78 | Patients who were admitted to the People’s Hospital of Lukou District in China, the designated hospital for the isolation and treatment of COVID-19 patients in Zhuzhou City, between January 28 and March 15, 2020. | N/A | 0.1 | Immunoglobulin M antibody (Legionella pneumophila, Coxiella burnetii, influenza A virus, influenza B virus, M. pneumoniae, Chlamydia pneumoniae, RSV, adenoviruses, and human parainfluenza virus) | N/A | 1. Elevated procalcitonin levels in COVID-19 patients may be a sign of the presence of infection with other respiratory tract pathogens. 2. The patients with co-infection were significantly more likely to have elevated PCT levels than those with mono-infection, suggesting greater severity of inflammatory responses in co-infected patients. 3. Increased levels of PCT in patients with COVID-19 pneumonia were associated with co-infection. |
| Garrido et al. [28] | Reus, Spain | Retrospective observational study | March 2020 - May 2020 | To investigate whether blood PCT level is a useful marker of bacterial coinfection at Emergency Department (ED) and nosocomial bacterial infection in ICU patients with pneumonia due to SARS-CoV2. | Median: 60 | 56 | All patients met the diagnosis criteria of pneumonia due to SARS-CoV2 defined as a positive result on real-time reverse transcription-polymerase chain reaction (RT-PCR) test of nasopharyngeal swab specimens and compatible positive chest imaging test (X-ray or computerized tomography). | 1. Patients under the age of 18 2. Pregnant women  3. Patients with do-not-resuscitate (DNR) or do-not- intubate (DNI) | 2 cutoffs were used:  0.3,  0.06 | 1. Blood, valid sputum, trachea aspirate, or pleural effusion culture  2. Antigen test for detection of S. pneumoniae and L. pneumophila in urine  3. Serum samples for serological tests for M. pneumoniae, C. pneumoniae and L. pneumoniae | N/A | 1. An inverse correlation between blood PCT levels and estimated GFR at hospital admission. 2. higher blood PCT levels in those patients who died (0.67ng/ml) and confirming the utility of initial blood PCT level as a marker of mortality. 3. Blood PCT levels were high in COVID-19 patients and variations in serial blood PCT levels did not help to detect bacterial nosocomial infections. |
| Roy et al. [29] | Jacksonville, Florida, USA | Retrospective observational study | March 1, 2020 - August 14, 2020 | To evaluate the association between PCT levels and superadded bacterial infections in COVID-19 pneumonia, and to evaluate the effect of early discontinuation of antibiotics in the low PCT (<0.25 ng/mL) group on patient outcomes | Median**:** 63 | 147 | All COVID-19 patients admitted to the institution between March 1 2020 - August 14 2020. | N/A | 0.25 | Blood Culture Sputum Culture | N/A | Our study denotes that PCT levels are usually low in patients with COVID-19 pneumonia. Slight elevations of PCT in COVID-19 pneumonia are most likely related to inflammation and not due to superadded bacterial infection. Markedly elevated PCT is an indicator for superadded bacterial infection in this setting. Early de-escalation/discontinuation of antibiotics based on PCT level in patients with COVID-19 pneumonia is probably safe and effective without causing any obvious adverse effects on patient outcomes. Early discontinuation of antibiotics is associated with a shorter length of hospitalization and potentially lower hospital costs. |
